# Supplementary material for: Diversity patterns and drivers of soil microbial communities in urban and suburban park soils of Shanghai, China
Source: PeerJ journal article supplement (doi:10.7717/peerj.11231), 2021-04-15

**(a) Bacteria**

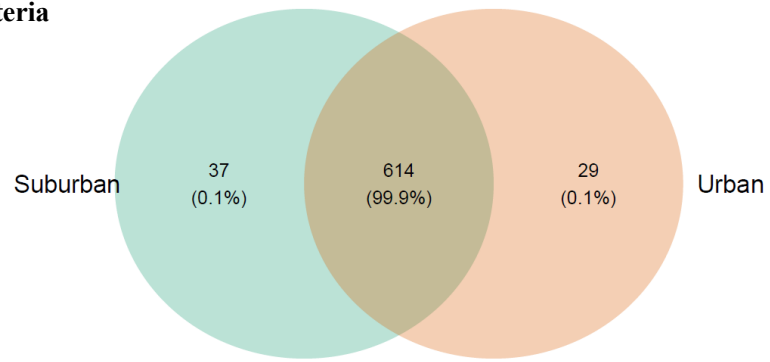

**(b) Fungi**

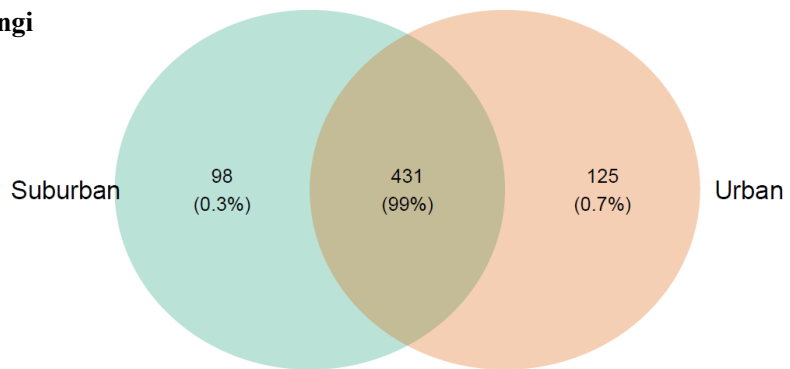

Supplement: Figure_S2.pdf [file Figure_S2.pdf]
